# Supplementary material for: Combusted-diesel additives containing CeO2 nanomaterials shape methanogenic pathways during sludge digestion and enhance biogas production
Source: Royal Society of Chemistry journal article supplement (doi:10.1039/d2en00389a), 2022-01-01
Supplement: d2en00389a1.pdf [file d2en00389a1.pdf]

## SUPPORTING INFORMATION of “Combusted-diesel additives containing CeO<sub>2</sub> nanomaterials shape methanogenic pathways during sludge digestion and enhance biogas production”

Auffan Mélanie<sup>a,b</sup>, Kabore Abdoul Karim<sup>a</sup>, Cuny Anais<sup>a,c</sup>, Amin Ali Oulfat<sup>c</sup>, Barakat Mohamed<sup>c</sup>, Angeletti Bernard<sup>d</sup>, Proux Olivier<sup>d</sup>, Bottero Jean-Yves<sup>a,b</sup>, Roche Nicolas<sup>a,e</sup>, Santaella Catherine<sup>c</sup>

<sup>a</sup> CEREGE, CNRS, Aix Marseille Univ, IRD, INRAE, Aix-en-Provence, France

<sup>b</sup> Civil and Environmental Engineering, Duke University, Durham, NC 27708, USA

<sup>c</sup> Aix Marseille Univ, CEA, CNRS, BIAM, LEMIRE, Saint-Paul-Lez-Durance, France

<sup>d</sup> OSUG, UAR 832 CNRS - Univ. Grenoble Alpes, IRSTEA, INRAe, Météo-France, Grenoble, France

<sup>e</sup> International Water Research Institute (IWR), Mohammed VI Polytechnic University, Ben Guerir 43150, Morocco

**Feature volatility analysis: dynamic view of important features:** For a dynamic visualization of the feature volatility analysis, open the <https://view.qiime2.org/> and drag the volatility\_plot.qzv file into the frame. Select group column “treatment” and the ASV number in the metric column menu.

Figure S 1. Aerobic wastewater treatment operating parameters: (A) Evolution of VSS, (B) COD removal, (C) Nitrogen removal, (D) Phosphorus removal, (E) ATP production, (F) pH evolution.

Figure S 2. Microbial community structure of the aerobic sludge. PCA based on Weighted UniFrac distance Abundance & Phylogeny.

Figure S 3. Aerobic sludge response following combusted CeO<sub>2</sub> NMs dosing. (A, B) Specific hydrolytic enzyme activities (Protease and  $\alpha$ -glucosidase), (C, D) Polysaccharides of extracellular polymeric substances secretion during the aerobic sludge culture. \*Represents data that are statistically significant (p-value<0.05). Values are average  $\pm$  standard deviation.

Figure S 4. Distribution and speciation of Ce during the anaerobic sludge production. (Left) Total and dissolved (<3 KDa) Ce concentrations remaining in the liquid phase after separation by centrifugation of the anaerobic sludge (Black symbols). Blue squares represent the total concentration of combusted CeO<sub>2</sub> NMs (in mg CeO<sub>2</sub>.L<sup>-1</sup>) injected in the digestors during 40 days. Red circles represent the Ce concentration in the liquid phase of control digestors at the end of the experiment. Values are means of three repetitions  $\pm$  standard deviation. (Right) Experimental HERFD-XANES spectra at the Ce L<sub>3</sub>-edge in the anaerobic sludge fed with contaminated aerobic sludge. Experimental XANES spectrum is compared to Ce (III)-phosphate and initial combusted Envirox<sup>TM</sup> reference compounds.

Figure S 5. Anaerobic digestion operating parameters. (A). Time course of volatile suspended solids, (B). ATP production, (C). Culture pH. Opened symbols correspond to control culture and filled symbols to reactor spiked with comb-CeO<sub>2</sub> NMs.

Figure S 6. Microbiome composition in the control and comb-CeO<sub>2</sub> contaminated AD. Stacked bar plots showing the relative abundance and distribution of the total microbial community at class level at day (D) 1, 11, 19, 22 and 29.

Figure S 7. Feature volatility analysis: abundance ( $\pm$  error bars) of the two most discriminatory ASV over time between the control (orange) and the comb-CeO<sub>2</sub> AD.

Figure S 8. Main physico-chemical and structural and characteristics adapted from Auffan et al. (2017).

Table S 1. Feature volatility analysis is used to determine how microbial communities change over time on the ASV level. Feature importance, and descriptive statistics (global mean and global standard deviation) help guiding an exploratory investigation to identify relevant features for subsequent investigation <sup>50</sup>.

Table S <sup>46</sup>. Differentially abundant taxa between the control and comb-CeO<sub>2</sub> contaminated AD. Linear Discriminant Analysis Effect Size (LEfSe): all linear discriminant analysis [LDA] scores, >3). Taxonomy levels: (p), phylum; (c), class; (o), order; (f), family; (g), genus. Relative abundances of taxa that are increased in the control (green) and comb-CeO<sub>2</sub> contaminated (red) AD.

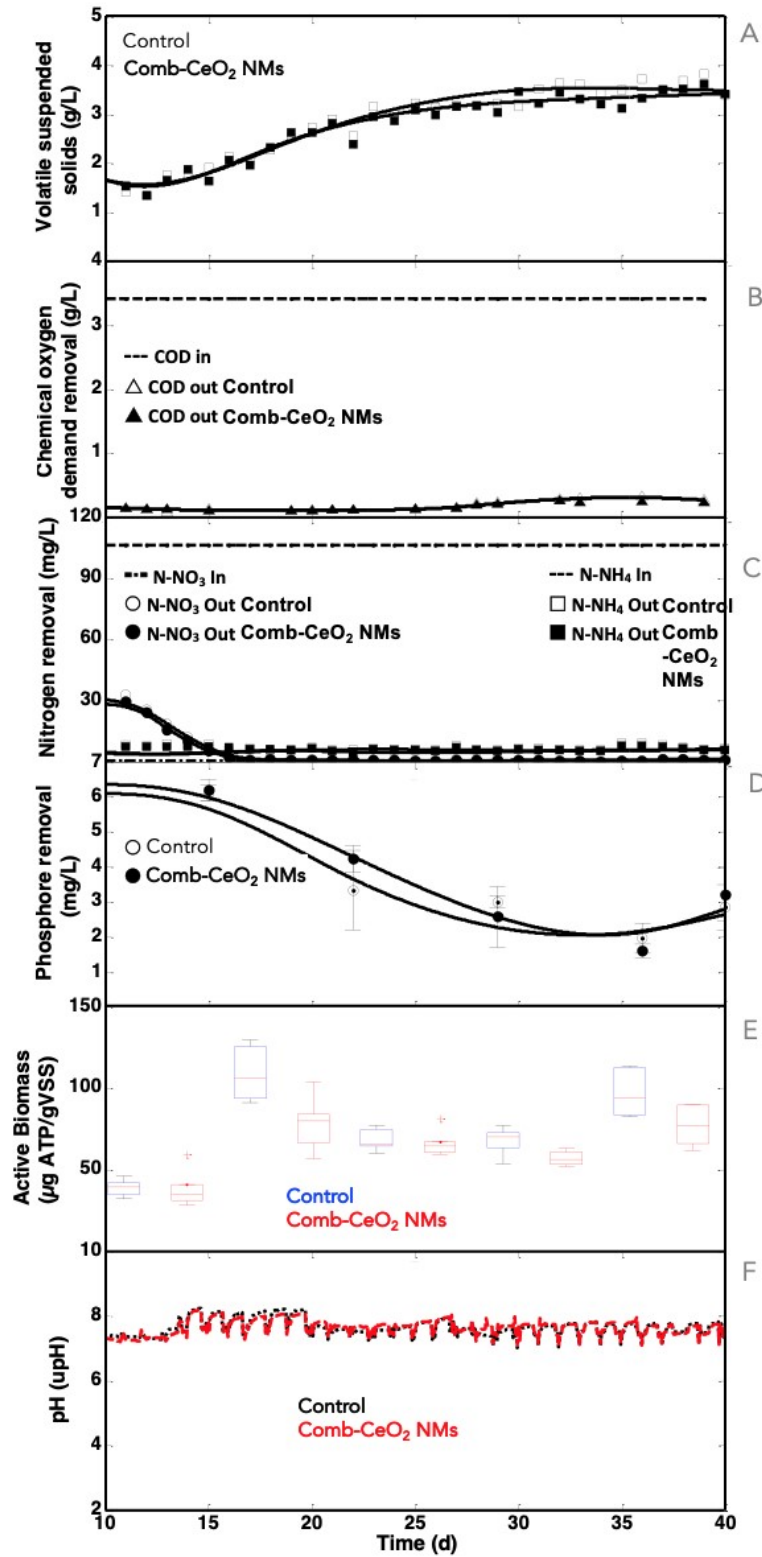

Figure S 1. Aerobic wastewater treatment operating parameters: (A) Evolution of VSS, (B) COD removal, (C) Nitrogen removal, (D) Phosphorus removal, (E) ATP production, (F) pH evolution.

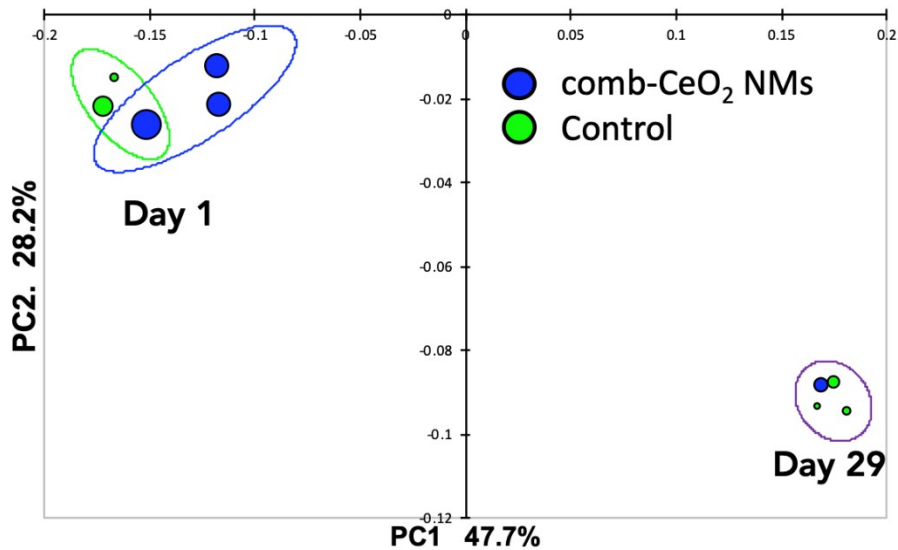

Figure S 2. Microbial community structure of the aerobic sludge. PCA based on Weighted UniFrac distance Abundance & Phylogeny.

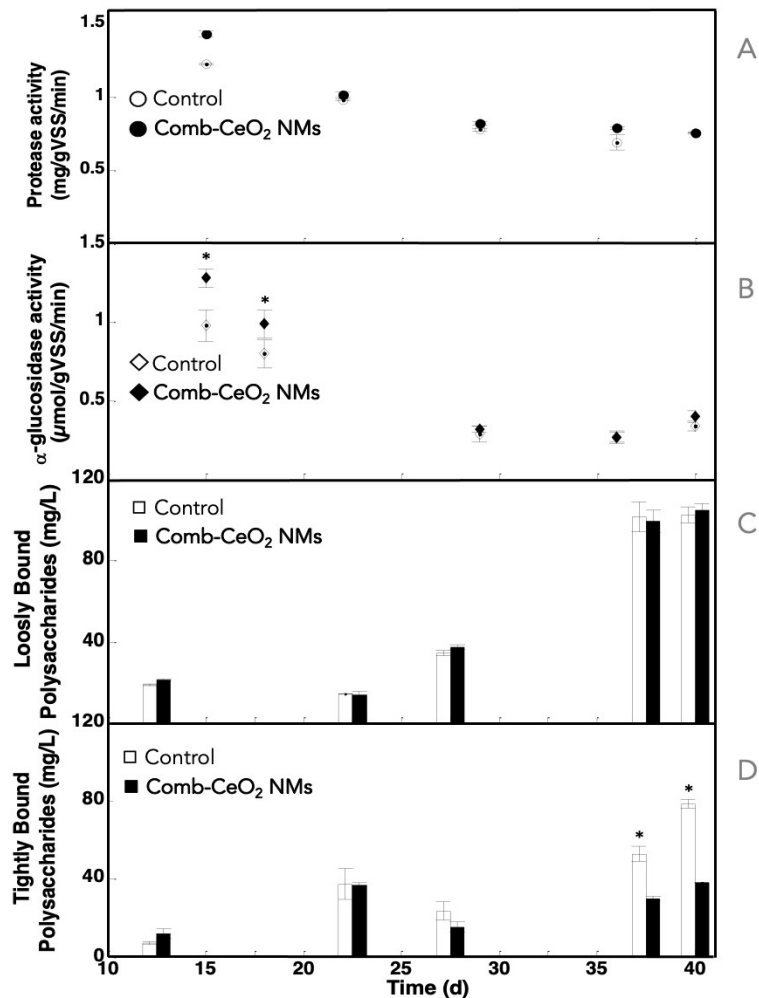

Figure S 3. Aerobic sludge response following combusted CeO<sub>2</sub> NMs dosing. (A, B) Specific hydrolytic enzyme activities (Protease and  $\alpha$ -glucosidase), (C, D) Polysaccharides of extracellular polymeric substances secretion during the aerobic sludge culture. \*Represents data that are statistically significant (p-value < 0.05). Values are average  $\pm$  standard deviation.

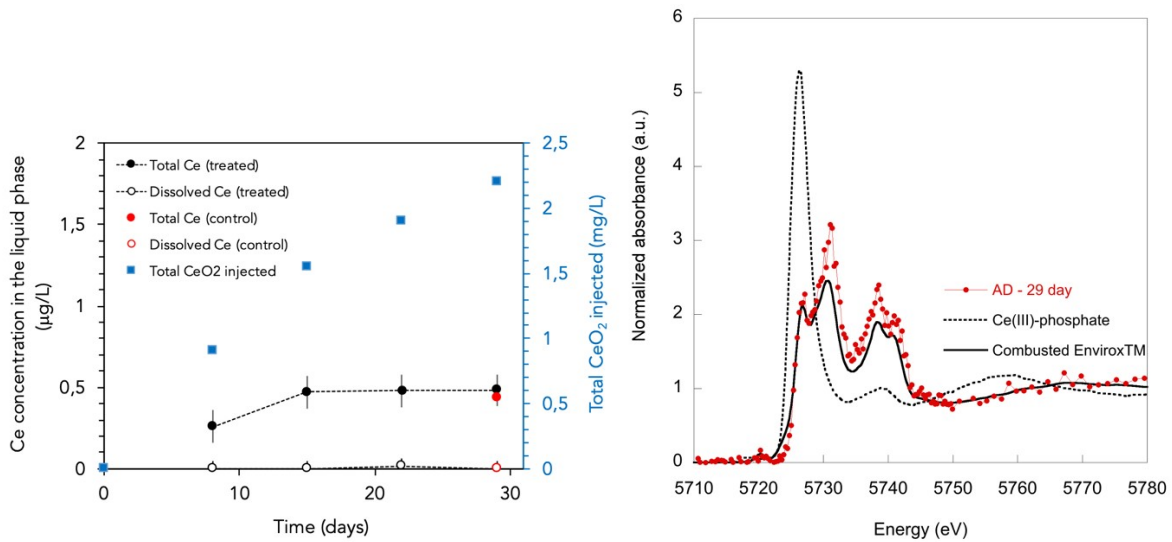

Figure S 4. Distribution and speciation of Ce during the anaerobic sludge production. (Left) Total and dissolved (<3 KDa) Ce concentrations remaining in the liquid phase after separation by centrifugation of the anaerobic sludge (Black symbols). Blue squares represent the total concentration of combusted CeO<sub>2</sub> NMs (in mg CeO<sub>2</sub>·L<sup>-1</sup>) injected in the digestors during 40 days. Red circles represent the Ce concentration in the liquid phase of control digestors at the end of the experiment. Values are means of three repetitions ± standard deviation. (Right) Experimental HERFD-XANES spectra at the Ce L<sub>3</sub>-edge in the anaerobic sludge fed with contaminated aerobic sludge. Experimental XANES spectrum is compared to Ce (III)-phosphate and initial combusted Envirox<sup>TM</sup> reference compounds.

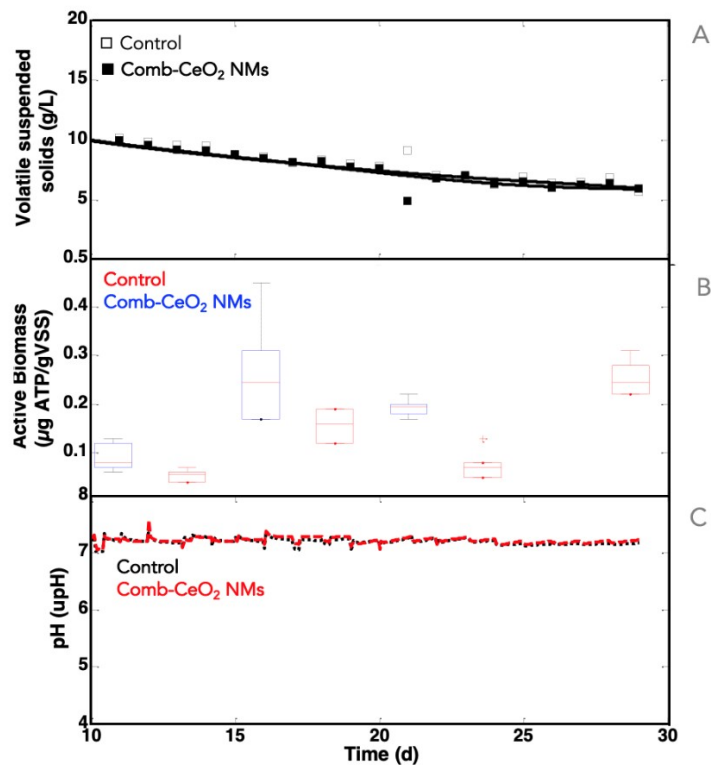

Figure S 5. Anaerobic digestion operating parameters. (A). Time course of volatile suspended solids, (B). ATP production, (C). Culture pH. Opened symbols correspond to control culture and filled symbols to reactor spiked with comb-CeO<sub>2</sub> NMs.

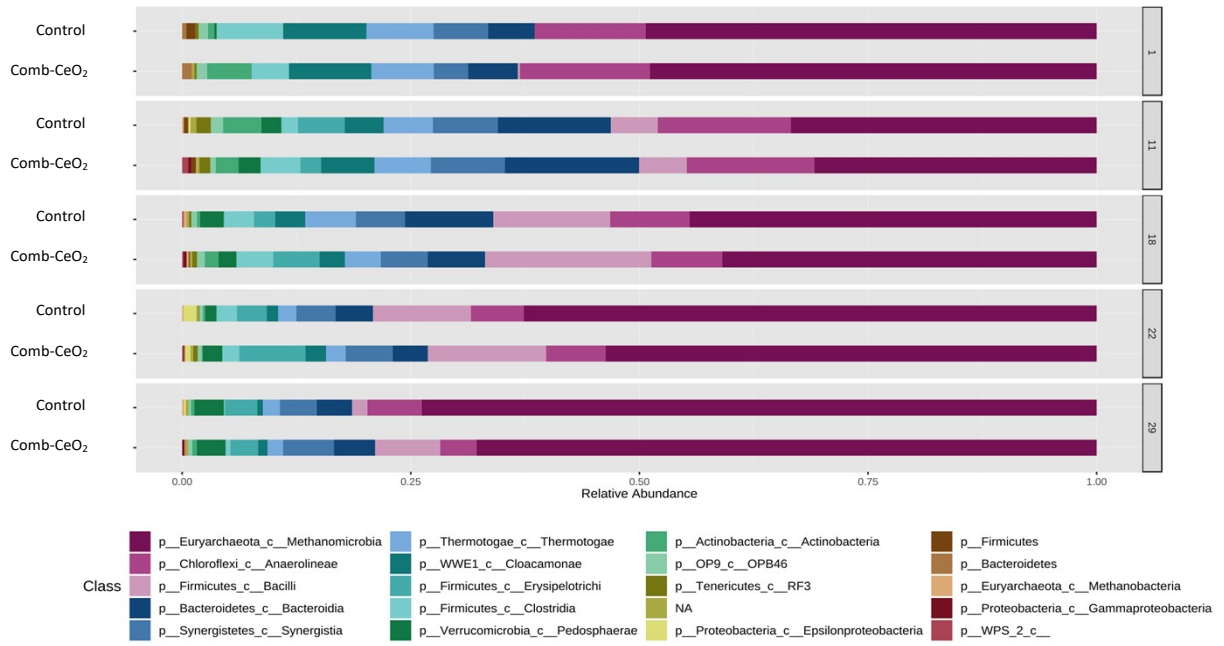

Figure S 6. Microbiome composition in the control and comb-CeO<sub>2</sub> contaminated AD. Stacked bar plots showing the relative abundance and distribution of the total microbial community at class level at day (D) 1, 11, 19, 22 and 29.

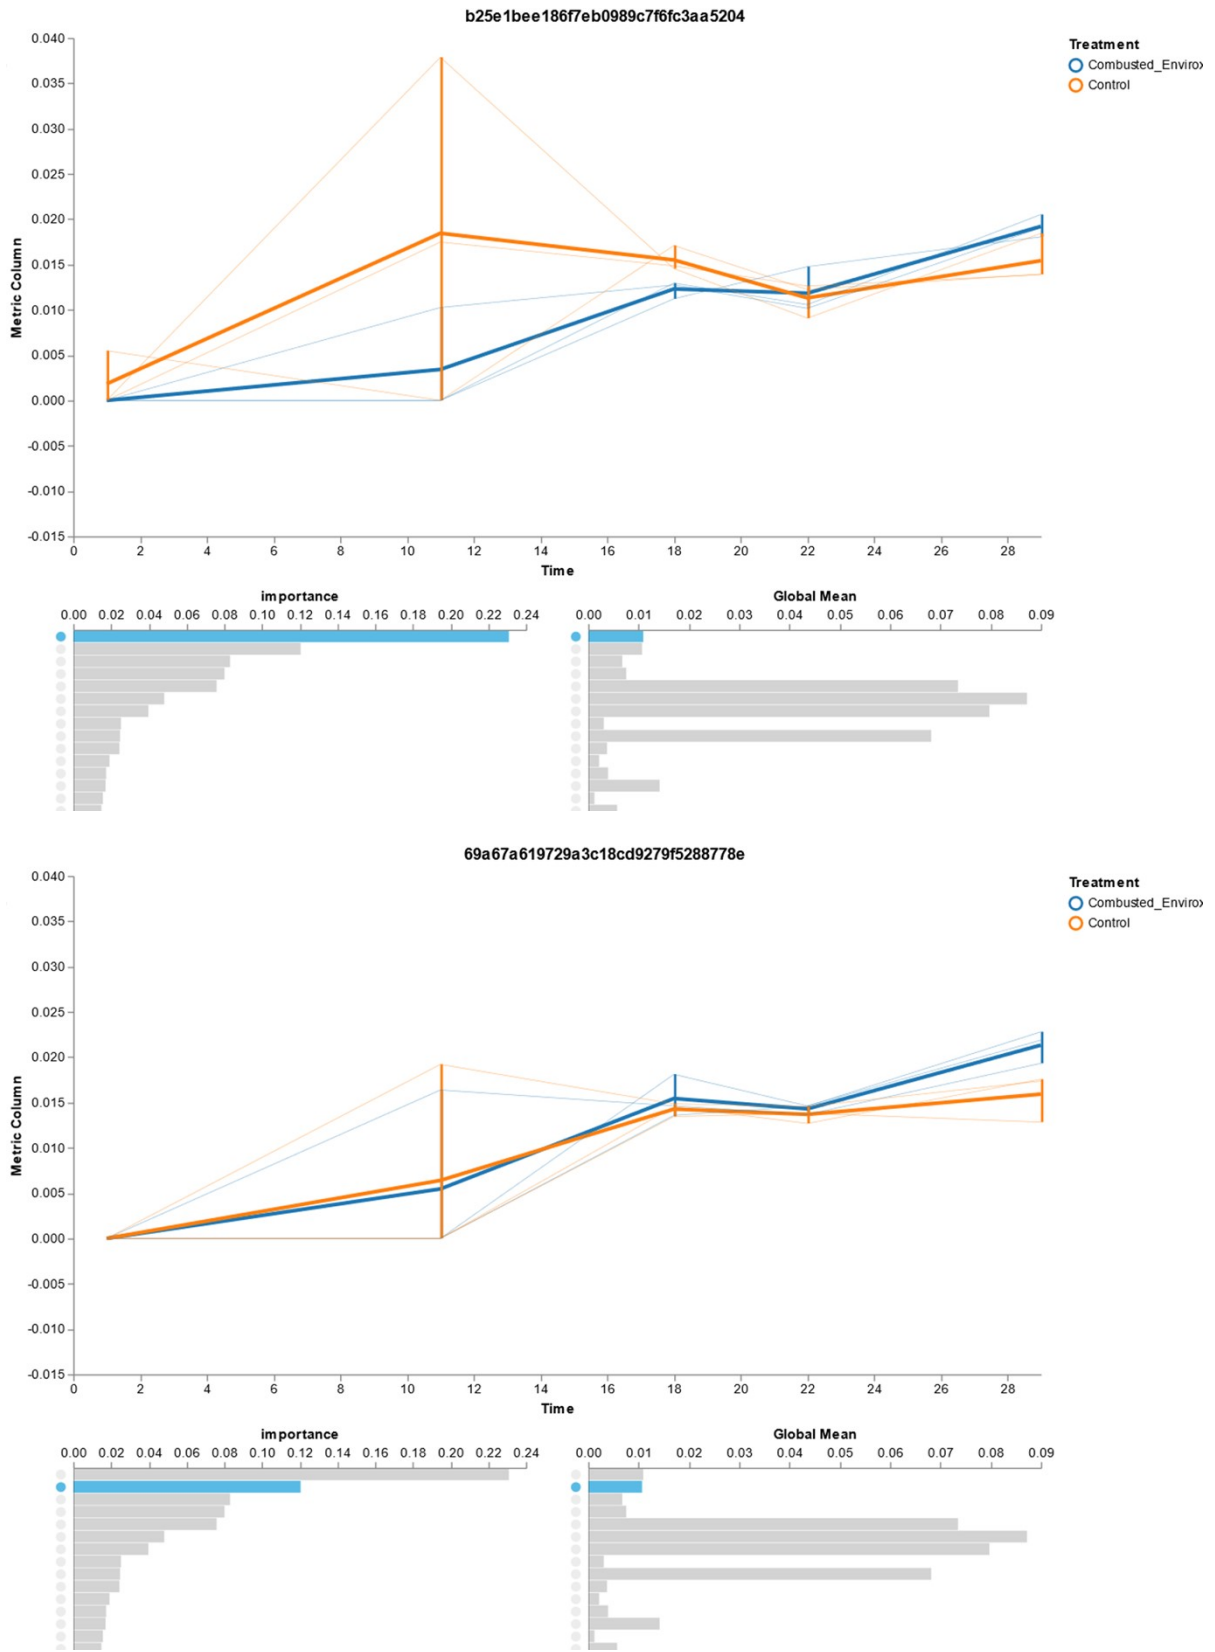

Figure S 7. Feature volatility analysis: abundance ( $\pm$  error bars) of the two most discriminatory ASV over time between the control (orange) and the comb-CeO<sub>2</sub> AD.

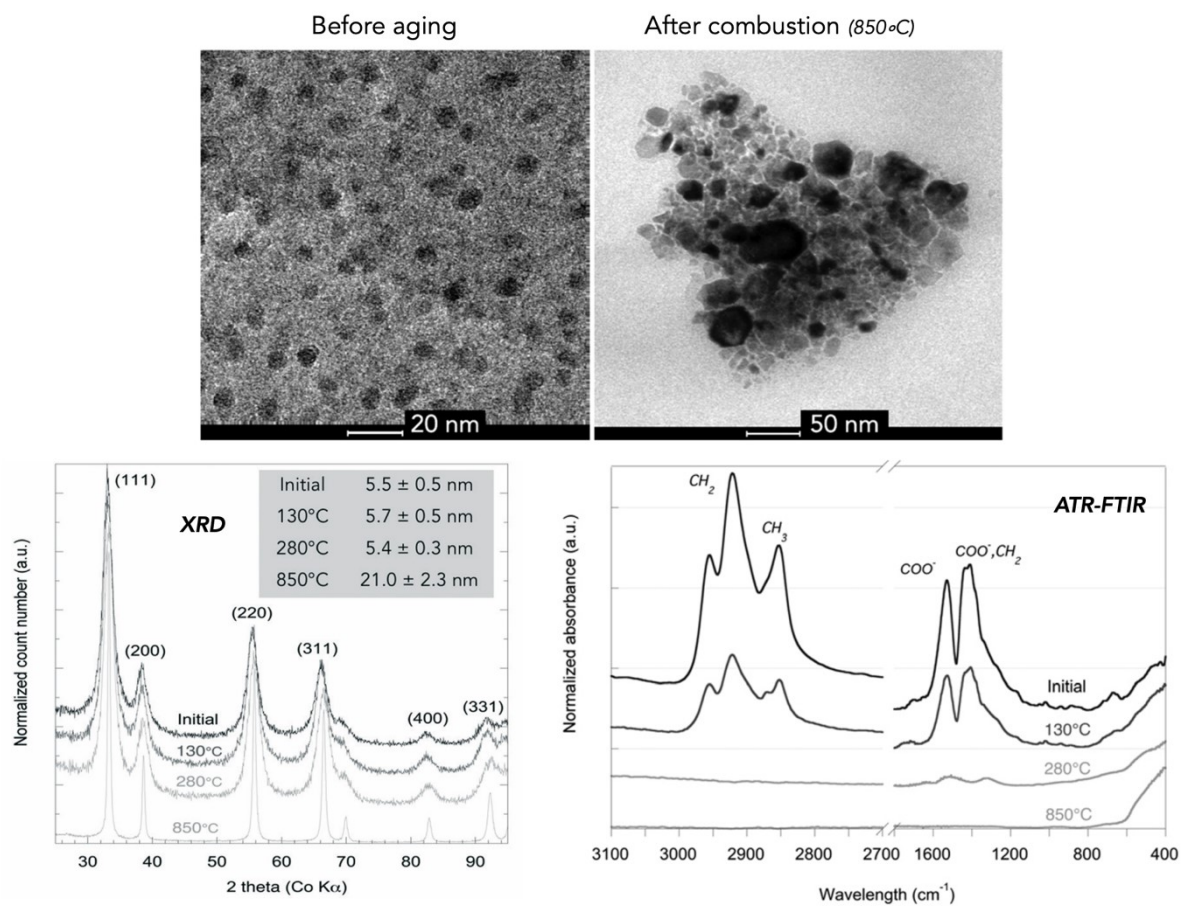

Figure S 8. Main physico-chemical and structural and characteristics adapted from Auffan et al. (2017).

Table S 1. Feature volatility analysis is used to determine how microbial communities change over time on the ASV level. Feature importance, and descriptive statistics (global mean and global standard deviation) help guiding an exploratory investigation to identify relevant features for subsequent investigation<sup>50</sup>.

| ASV id                           | Taxonomy                                                                                                                                | Importance | Global Mean | Global Standard Deviation |
|----------------------------------|-----------------------------------------------------------------------------------------------------------------------------------------|------------|-------------|---------------------------|
| b25e1bee18677eb0898c7f6fc3aa5204 | k__Archaea; p__Euryarchaeota; c__Methanomicrobiales; f__Methanoregularae; g__Methanosphaera; s__                                        | 0.23092847 | 0.010925007 | 0.008577815               |
| 69a67a19729a3c18cd9279f5e288778e | k__Archaea; p__Euryarchaeota; c__Methanomicrobiales; f__Methanoregularae; g__Methanosphaera; s__                                        | 0.12050728 | 0.010880877 | 0.008045194               |
| 7afe23990e04de1c9f43a641f7b6fd9  | k__Bacteria; p__Firmicutes; c__Erysipelotrichi; o__Erysipelotrichales; f__Erysipelotrichaceae; g__Clostridium                           | 0.08310119 | 0.006762499 | 0.006581115               |
| 07300b6d32de20a6780fee670ef7848  | k__Archaea; p__Euryarchaeota; c__Methanomicrobiales; f__Methanocorpusculae; g__Methanocorpusculum; s__                                  | 0.08013636 | 0.007543341 | 0.007733178               |
| 5d62e652303e12b3688e6dd8a655c97  | k__Archaea; p__Euryarchaeota; c__Methanomicrobiales; f__Methanocorpusculae; g__Methanocorpusculum; s__                                  | 0.07594373 | 0.073510722 | 0.029663486               |
| fa432c2a8dd82599b6149bdebea0c5cc | k__Archaea; p__Euryarchaeota; c__Methanomicrobiales; f__Methanocorpusculae; g__Methanocorpusculum; s__                                  | 0.04820452 | 0.087228068 | 0.035224222               |
| 016e4569ff3c443c63836c121e6b48   | k__Archaea; p__Euryarchaeota; c__Methanomicrobiales; f__Methanocorpusculae; g__Methanocorpusculum; s__                                  | 0.03976716 | 0.079744692 | 0.03191055                |
| 7ed38c44cfc94f855a421bc77e0554   | k__Bacteria; p__Firmicutes; c__Bacilli; o__Lactobacillales; f__Enterococcaceae; g__Enterococcus                                         | 0.02521171 | 0.003866683 | 0.006750624               |
| bd0b0379d263c2b64ca733677d44745a | k__Archaea; p__Euryarchaeota; c__Methanomicrobiales; f__Methanocorpusculae; g__Methanocorpusculum; s__                                  | 0.02474832 | 0.068180223 | 0.02640936                |
| 18b65b953a2d2e7644a4a0820c236b4  | k__Archaea; p__Euryarchaeota; c__Methanomicrobiales; f__Methanocorpusculae; g__Methanocorpusculum; s__                                  | 0.02443555 | 0.007232002 | 0.004803437               |
| c795b44d8d52497644a0c39d2fd1     | k__Bacteria; p__Synergistetes; c__Synergistia; o__Synergistales; f__Dethiosulfovibrionaceae; g__HA73; s__                               | 0.01916828 | 0.00214778  | 0.00326215                |
| 1c4449e9b325b09240694db4b497f1   | k__Archaea; p__Euryarchaeota; c__Methanomicrobiales; f__Methanocorpusculae; g__Methanocorpusculum; s__                                  | 0.01734321 | 0.003933945 | 0.00512809                |
| 82396f2ab90f1d583a5e42e2a1198    | k__Bacteria; p__Firmicutes; c__Bacilli; o__Lactobacillales; f__Enterococcaceae; g__Enterococcus                                         | 0.01708814 | 0.014172222 | 0.015363745               |
| 457a4019d9525ec1abb55e91342f6f   | k__Bacteria; p__Firmicutes; c__Clostridia; o__Eubacteriales; f__Clostridiaceae; g__Lutispora; s__                                       | 0.01587157 | 0.00125333  | 0.002817788               |
| be9d945e7e21b9625e7d754c5c0c76   | k__Archaea; p__Euryarchaeota; c__Methanomicrobiales; f__Methanocorpusculae; g__Methanocorpusculum; s__                                  | 0.01487859 | 0.005727205 | 0.00681843                |
| 4d53af2498f70adbbd0ca35eb8e48a2  | k__Bacteria; p__Synergistetes; c__Synergistia; o__Synergistales; f__Dethiosulfovibrionaceae; g__HA73; s__                               | 0.01243279 | 0.004318722 | 0.005134768               |
| b94996aa83b530cc9954db84537165   | k__Bacteria; p__Firmicutes; c__Bacilli; o__Lactobacillales; f__Enterococcaceae; g__Enterococcus                                         | 0.01140165 | 0.015195941 | 0.016170305               |
| 7aca67a8d70252ba4d5a60c7ea210e   | k__Bacteria; p__Bacteroidetes; c__Bacteroidia; o__Bacteroidales; f__Marinifilabacterae; g__                                             | 0.0093195  | 0.006953402 | 0.007588195               |
| e73b7a0ad7ccc3b9eb91755deb4583c  | k__Bacteria; p__OP8; o__OP8_1; o__OP95; f__                                                                                             | 0.00884474 | 0.000882169 | 0.002210582               |
| 31b774be9385116bc9e55ea1ae2da1   | k__Bacteria; p__Chloroflexi; c__Anaerolineae; o__Anaerolineales; f__Anaerolineaceae; g__T78; s__                                        | 0.00832951 | 0.005219208 | 0.005176873               |
| 7e4a158ab22a1fc3521d2974c11d71   | k__Bacteria; p__Firmicutes; c__Bacilli; o__Lactobacillales; f__Enterococcaceae; g__Enterococcus                                         | 0.00831132 | 0.004532963 | 0.005370767               |
| e9034d5606226a6f7bceae755967d5   | k__Bacteria; p__WWE1; c__Cloacamonae; o__Cloacamonales; f__Cloacamonaceae; g__W5; s__                                                   | 0.00759834 | 0.004583006 | 0.006410354               |
| e95d0ff43acbc59798914446bc4a0083 | k__Bacteria; p__Bacteroidetes; c__Bacteroidia; o__Bacteroidales; f__Porphyromonadaceae; g__Paludibacter; s__                            | 0.00731582 | 0.004262497 | 0.005084272               |
| ee05394c1f83aa3947458c2393c7f    | k__Archaea; p__Euryarchaeota; c__Methanobacteriales; f__WSA2; g__                                                                       | 0.00687637 | 0.00094014  | 0.002126499               |
| 3a81c9f645bc328495012327abc0f7   | k__Bacteria; p__Firmicutes; c__Erysipelotrichi; o__Erysipelotrichales; f__Erysipelotrichaceae; g__Clostridium                           | 0.00659725 | 0.006918149 | 0.007352384               |
| d2ce3456f82292e79e34b9e2d715     | k__Bacteria; p__WWE1; c__Cloacamonae; o__Cloacamonales; f__Cloacamonaceae; g__W5; s__                                                   | 0.00586529 | 0.00353668  | 0.004541319               |
| 1b1bc30b8e3fae3899a6e7af8c5269   | k__Bacteria; p__Chloroflexi; c__Anaerolineae; o__Anaerolineales; f__Anaerolineaceae; g__T78; s__                                        | 0.00539825 | 0.005391113 | 0.006485766               |
| 15382277400c7f78118b35ea0860c    | k__Archaea; p__Euryarchaeota; c__Methanomicrobiales                                                                                     | 0.00473687 | 0.013208162 | 0.009044988               |
| 340c0e7f7f932a2e024db2156a6c5b   | k__Bacteria; p__Bacteroidetes; c__Bacteroidia; o__Bacteroidales; f__Porphyromonadaceae; g__Paludibacter; s__                            | 0.00411639 | 0.004132441 | 0.006039238               |
| 0e259dc3f35a8a3d137ca6c8efb100b  | k__Bacteria; p__Bacteroidetes; c__Bacteroidia; o__Bacteroidales; f__                                                                    | 0.00349114 | 0.000901942 | 0.002848567               |
| 37e74e8e8045d9128cd1a5a2e17b006  | k__Bacteria; p__Verrucomicrobia; c__Pedosphaerae; f__Pedosphaerales; f__R4-41B; g__                                                     | 0.00344443 | 0.003140521 | 0.003722265               |
| 1a8e569daab17f8ac0866603260c40   | k__Bacteria; p__Bacteroidetes; c__Bacteroidia; o__Bacteroidales; f__Porphyromonadaceae; g__Paludibacter; s__                            | 0.00314717 | 0.002954485 | 0.004714843               |
| 18777b7bc5ec4f55d2c3140cac7e4e   | k__Bacteria; p__Firmicutes; c__Erysipelotrichi; o__Erysipelotrichales; f__Erysipelotrichaceae; g__Clostridium                           | 0.00313986 | 0.009868156 | 0.007166936               |
| fa92c1a82d324034bac63bd2a181c    | k__Bacteria; p__Proteobacteria; c__Gammaproteobacteria; o__HOC36; f__                                                                   | 0.00269621 | 6.33E-05    | 0.000251113               |
| daa6048e0f7d2ec1ade44d130a21     | k__Bacteria; p__Synergistetes; c__Synergistia; o__Synergistales; f__Dethiosulfovibrionaceae; g__HA73; s__                               | 0.00269271 | 9.29E-05    | 0.000353433               |
| 100e04e9925325550702ea16c4519a   | k__Bacteria; p__Chloroflexi; c__Anaerolineae; o__Anaerolineales; f__Anaerolineaceae; g__T78; s__                                        | 0.00263168 | 0.007947818 | 0.004657548               |
| 924f93b61584e812e9f73a5c214d6e   | k__Bacteria; p__Thermotogae; c__Thermotogae; o__Thermotogales; f__Thermotogaceae; g__Kosmotoga; s__mrj                                  | 0.00241075 | 0.004462647 | 0.006253501               |
| c9186cb86211857b2d4fd4f686f6a3   | k__Bacteria; p__Verrucomicrobia; c__Thermotogae; o__Limnisphearae; f__Limnisphearae; g__                                                | 0.00216657 | 0.000926241 | 0.005133123               |
| 1a1acec9969c0c502af1f7a5e771c    | k__Bacteria; p__Firmicutes; c__Clostridia; o__SHA-98; f__                                                                               | 0.00203682 | 0.000370014 | 0.001569175               |
| 164078135a4d12642851d2309177ad7  | k__Bacteria; p__WWE1; c__Cloacamonae; o__Cloacamonales; f__Cloacamonaceae; g__BHB21; s__                                                | 0.00192308 | 0.001175615 | 0.00319054                |
| 003dea16a248b965c396839360571c   | k__Bacteria; p__Firmicutes; c__Clostridia; o__Clostridiales; f__Clostridiaceae; g__Clostridium; s__calatum                              | 0.00189937 | 0.000474282 | 0.001188712               |
| dfaf4f6b1d2137a5c18fbc0f937900   | k__Bacteria; p__Chloroflexi; c__Anaerolineae; o__SHA-20; f__                                                                            | 0.00171931 | 0.00014706  | 0.000809642               |
| fd8ae426805e27be1944109d97f2     | k__Bacteria; p__WWE1; c__Cloacamonae; o__Cloacamonales; f__Cloacamonaceae; g__W5; s__                                                   | 0.00158044 | 0.004411748 | 0.006424281               |
| dc9fb0a0de0e05ab4d29c9e795a24ef  | k__Archaea; p__Euryarchaeota; c__Methanomicrobiales; f__Methanocorpusculae; g__Methanosarcina                                           | 0.00148654 | 0.003308502 | 0.000579936               |
| e076ad1e04e3d3e3671e2fdeab8aa    | k__Bacteria; p__Firmicutes; c__Bacilli; o__Lactobacillales                                                                              | 0.00145262 | 0.002882965 | 0.004854244               |
| 0c5738909b7b0da0c5289b842c78b0   | k__Bacteria; p__Bacteroidetes; c__Bacteroidia; o__Bacteroidales; f__BA08; g__                                                           | 0.00127368 | 0.001128862 | 0.001933484               |
| fae185507dc6477376509ad23e1e64a  | k__Bacteria; p__Actinobacteria; c__Actinobacteria; o__Actinomycetales; f__Mycobacteriaceae; g__Mycobacterium                            | 0.00119538 | 0.003298485 | 0.006485537               |
| 4ff4d5b6ca3155aeb640d5866a4ace7  | k__Bacteria; p__WWE1; c__Cloacamonae; o__Cloacamonales; f__Cloacamonaceae; g__BHB21; s__                                                | 0.00107646 | 0.005433821 | 0.006559024               |
| 0ee1f6bd0d325b91de28ca186e69b6e  | k__Bacteria; p__Bacteroidetes; c__Bacteroidia; o__Bacteroidales; f__Porphyromonadaceae; g__Paludibacter; s__                            | 0.00100398 | 0.000982433 | 0.001893398               |
| d0f01b515504b09960ed27ad306084a  | k__Bacteria; p__Chloroflexi; c__Anaerolineae; o__Anaerolineales; f__Anaerolineaceae; g__T78; s__                                        | 0.00097653 | 0.004219963 | 0.003735722               |
| 0f0d51c640774ef5e01520881c850655 | k__Bacteria; p__Firmicutes; c__Clostridia; o__SHA-98; f__                                                                               | 0.00095082 | 0.000771151 | 0.000232824               |
| 3516b33b0e5c1f18a8e462c051f141b  | k__Bacteria; p__Proteobacteria; c__Epsilonproteobacteria; o__Campylobacteriales; f__Campylobacteraceae; g__Acrobacter; s__cryaerophilus | 0.00091637 | 0.00191792  | 0.000395195               |
| ee20e6bc40167847b4946e6a6c9950   | k__Bacteria; p__Thermotogae; c__Thermotogae; o__Thermotogales; f__Thermotogaceae; g__Kosmotoga; s__mrj                                  | 0.00090712 | 0.007265767 | 0.005755426               |
| e2bc572632e1414b6960b3fec430f0f  | k__Bacteria; p__Chloroflexi; c__Anaerolineae; o__DRC31; f__                                                                             | 0.00086326 | 0.00074654  | 0.003114053               |
| ae37a52e042a90525385a968ba6506   | k__Bacteria; p__Bacteroidetes                                                                                                           | 0.00082182 | 0.000802736 | 0.001844055               |
| e3ff1d12b164cf0f2e3e7ceac32cae7  | k__Bacteria; p__Chloroflexi; c__Anaerolineae; o__SBR1031; f__A4b; g__                                                                   | 0.00080778 | 2.24E-05    | 0.000122753               |
| 4aa09e866125c1839a3f3ca8e5c1b    | k__Bacteria; p__Chloroflexi; c__Thermotogae; o__Thermotogales; f__Thermotogaceae; g__Kosmotoga; s__mrj                                  | 0.00076362 | 0.000447789 | 0.001246313               |
| 59e8940c3f17931f2f4b4e479f6f     | k__Bacteria; p__Thermotogae; c__Thermotogae; o__Thermotogales; f__Thermotogaceae; g__Kosmotoga; s__mrj                                  | 0.00075587 | 0.00087668  | 0.000279961               |
| 0c38a56bd2609e5283c152ea15a0053  | k__Bacteria; p__Proteobacteria; c__Gammaproteobacteria; o__Xanthomonadales; f__Xanthomonadaceae; g__Dokdonella; s__                     | 0.00066447 | 9.71E-05    | 0.000531928               |
| 148ae43b49bd18bc9ca73fbc18db4    | k__Bacteria; p__Chloroflexi; c__Chloroflexi; o__Roseiflexales; f__Koulothraxaceae; g__                                                  | 0.00060662 | 3.98E-05    | 0.00021798                |
| 8adea10902b6443b75e724402e47c    | k__Bacteria; p__Firmicutes; c__Clostridia; o__Clostridiales; f__Lachnospiraceae                                                         | 0.00059201 | 0.0024889   | 0.004677789               |
| efec3d80e500decbb2e643c0de14a    | k__Bacteria; p__Proteobacteria; c__Deltaproteobacteria; o__Syntrophobacterales; f__Syntrophobacterales; g__                             | 0.00045399 | 6.37E-05    | 0.000394909               |
| b1f9fb2f0c829b9528a75d7236e6d3   | k__Bacteria; p__Firmicutes; c__Clostridia; o__OPB54; f__                                                                                | 0.00045339 | 0.000464838 | 0.0003719592              |
| 9f857aad6d33b8b93843229b3562611  | k__Archaea; p__Euryarchaeota; c__Methanomicrobiales; f__Methanocorpusculae; g__Methanocorpusculum; s__                                  | 0.00044247 | 0.002831814 | 0.004608879               |
| 06bc973407a92d681af5496290c      | k__Bacteria; p__Chloroflexi; c__Anaerolineae; o__                                                                                       | 0.00041608 | 0.001087542 | 0.00209334                |
| fae9d71d060c3be71805ec2c8683005  | k__Bacteria; p__Chloroflexi; c__Anaerolineae; o__Anaerolineales; f__Anaerolineaceae; g__T78; s__                                        | 0.00029097 | 0.003424254 | 0.005912625               |
| 60ef4d2804f1ace93b95f7e6e5a545   | k__Bacteria; p__Chloroflexi; c__Anaerolineae; o__Anaerolineales; f__Anaerolineaceae; g__T78; s__                                        | 0.00028445 | 0.009619875 | 0.005372838               |
| fb06b629b72b328f67171b6959c8a0b  | k__Bacteria; p__Proteobacteria; c__Epsilonproteobacteria; o__Campylobacteriales; f__Campylobacteraceae; g__Acrobacter; s__cryaerophilus | 0.00024911 | 0.00144479  | 0.003285478               |
| fd2043bfaa75060dbec3a3d51703454  | k__Archaea; p__Euryarchaeota; c__Methanomicrobiales; f__Methanocorpusculae; g__Methanosarcina; s__mazel                                 | 0.00019053 | 0.002970585 | 0.004531108               |
| 18e93e5a4902529c9f7fc3b1d2b71    | k__Bacteria; p__Chloroflexi; c__Anaerolineae; o__GCA004; f__                                                                            | 0.00018605 | 0.000613569 | 0.000500729               |
| 23b1ceda51870533e4522d05913610   | k__Bacteria; p__Firmicutes; c__Clostridia; o__Clostridiales; f__Tissierellaceae; g__Sedimentibacter; s__                                | 0.00017894 | 0.000631331 | 0.001353006               |
| edc9f3b681181488510f7ba1b8c25    | k__Bacteria; p__Verrucomicrobia; c__Pedosphaerae; f__Pedosphaerales; f__R4-41B; g__                                                     | 0.00017812 | 0.002716979 | 0.003502748               |
| 1613e04d58517632bc8139209b7d7a7  | k__Bacteria; p__Planctomycetes; c__Planctomycetia; o__Planctomycetales; f__Planctomycetaceae; g__Planctomycetes; s__                    | 0.00016114 | 1.23E-05    | 6.71E-05                  |
| ded64b574c09badc1509404654073    | k__Bacteria; p__Bacteroidetes; c__Bacteroidia; o__Bacteroidales; f__BA08; g__                                                           | 9.24E-05   | 0.000380536 | 0.001253673               |
| 0a32c8a8c9d042579418219166903    | k__Bacteria; p__WPS-2; c__                                                                                                              | 8.20E-05   | 0.000122775 | 0.000672465               |
| 0e049912b2c287528c96739063a507   | k__Bacteria; p__Armatimonadetes; c__SJA-176; o__RB046; f__                                                                              | 0          | 0.000123158 | 0.000485647               |
| 0e71d2ab88063c4e4484849036b4334  | k__Bacteria; p__WS1; c__                                                                                                                | 0          | 2.80E-05    | 0.000153327               |
| 0e8f3b3ae8b19e8a045a222bd2466a7  | k__Bacteria; p__Firmicutes; c__Clostridia                                                                                               | 0          | 0.000598336 | 0.001596128               |
| 0e939130fd103711b1bd8b1bb1432bf  | k__Bacteria; p__Bacteroidetes; c__Bacteroidia; o__Bacteroidales; f__                                                                    | 0          | 3.16E-05    | 0.00017308                |
| 0ed716825d213b3aca0e1efa230ad6   | k__Bacteria; p__Armatimonadetes; c__SJA-176; o__RB046; f__                                                                              | 0          | 0.000439843 | 0.002409119               |
| 116638569a765a49e6676a7ca039c0   | k__Bacteria; p__Firmicutes; c__Clostridia; o__Thermoanaerobacterales; f__                                                               | 0          | 2.84E-05    | 0.00011557                |
| 05f105e4d01361dae8c46f5deb3e9    | k__Archaea; p__Euryarchaeota; c__Methanomicrobiales; f__Methanosarcinaceae; g__Methanosarcina; s__                                      | 0          | 0.000230234 | 0.000710694               |
| 0295224e9bd4c46d9f8c971549af2    | k__Archaea; p__Euryarchaeota; c__Methanobacteriales; f__Methanobacteriales; g__Methanobacterium; s__                                    | 0          | 0.000951817 | 0.002041983               |
| 0684014c4d54892c4f0c068b5e4d4e   | k__Bacteria; p__Bacteroidetes; c__Bacteroidia; o__Bacteroidales; f__SB-1; g__                                                           | 0          | 3.97E-05    | 0.000217609               |
| 0fd24ffe6e3af5b614c2dbde463af2   | k__Bacteria; p__Firmicutes; c__Clostridia; o__Clostridiales; f__Syntrophomonadaceae; g__Syntrophomonas; s__                             | 0          | 0.000898991 | 0.001684713               |
| 0f78f0c0be15f7b3b8c00ec906d14    | k__Bacteria; p__Proteobacteria; c__Gammaproteobacteria; o__Xanthomonadales; f__Sinobacteraceae; g__                                     | 0          | 4.74E-05    | 0.000259661               |
| 0c12a82b5bd52834f8ac998b8e3d04   | k__Bacteria                                                                                                                             | 0          | 2.00E-05    | 0.000190539               |
| 104d10c98856b164ec0004f272525d9  | k__Bacteria; p__Firmicutes; c__Clostridia; o__MBA08; f__                                                                                | 0          | 0.000181238 | 0.00075878                |
| 10cded4995b9114c4bca6b5fbdca3a   | k__Bacteria; p__Bacteroidetes; c__Bacteroidia; o__Bacteroidales                                                                         | 0          | 6.46E-05    | 0.000176936               |
| 175ec29f5320544a571dc6b884c4f62  | k__Bacteria; p__Chloroflexi; c__Anaerolineae; o__SHA-20; f__                                                                            | 0          | 0.000546668 | 0.001724775               |
| 108280bb4474fa4cfd5da5a5b56      | k__Bacteria; p__Chloroflexi; c__Chloroflexi; o__Roseiflexales; f__Koulothraxaceae; g__Koulothrax; s__                                   | 0          | 0.000179292 | 0.000982022               |
| 0d526e8aebad1f014d38b724ee6788   | k__Bacteria; p__Verrucomicrobia; c__Verruco-5; o__WCHB1-41; f__RFP12; g__                                                               | 0          | 0.0001431   | 0.00078379                |
| 175ea5410495d30f1514081755f543   | k__Bacteria; p__Spirochaetes; c__Spirochaetes; o__Spirochaetales; f__Spirochaetaceae; g__Treponema; s__                                 | 0          | 0.00021799  | 0.000841807               |
| 0                                |                                                                                                                                         |            |             |                           |



Table S 2. Differentially abundant taxa between the control and comb-CeO<sub>2</sub> contaminated AD. Linear Discriminant Analysis Effect Size (LEfSe): all linear discriminant analysis [LDA] scores, >3). Taxonomy levels: (p), phylum; (c), class; (o), order; (f), family; (g), genus. Relative abundances of taxa that are increased in the control (green) and comb-CeO<sub>2</sub> contaminated (red) AD.

| LDA Score | Taxa                                                                                               | Potential function                                                                                                                                                                                                      |
|-----------|----------------------------------------------------------------------------------------------------|-------------------------------------------------------------------------------------------------------------------------------------------------------------------------------------------------------------------------|
| 3.4       | <b>Archaea; Euryarchaeota; Methanomicrobia; Methanomicrobiales</b>                                 | The hydrogenotrophic order <i>Methanomicrobiales</i> includes <i>Methanoculleus spp.</i> , <i>Methanocorpusculum sp.</i> , and unclassified <i>Methanoregulaceae</i> (Ziganshin 2016)                                   |
| 4.3       | <i>Bacteria</i>                                                                                    |                                                                                                                                                                                                                         |
| 3.7       | <b>Bacteria; Bacteroidetes</b>                                                                     | Macromolecules degradation, volatil fatty acid (VFA) and alcohol production. Higher population of <i>Bacteroidetes</i> phyla are associated with high hydrolytic activity in full-scale anaerobic digesters (Khan 2021) |
| 3.7       | <i>Bacteria; Bacteroidetes; Bacteroidia</i>                                                        |                                                                                                                                                                                                                         |
| 3.6       | <b>Bacteria; Chloroflexi; Anaerolineae; GCA004</b>                                                 | Cellulose hydrolysis (Xia 2016), important for the granulation of sludge (Yamada and Sekiguchi 2009)                                                                                                                    |
| 4.3       | <i>Bacteria; Firmicutes</i>                                                                        | Macromolecules degradation, VFA and alcohol. Higher population of <i>Bacteroidetes</i> phyla can be associated with high hydrolytic activity in full-scale anaerobic digesters (Khan 2021)                              |
| 4.3       | <i>Bacteria; Firmicutes; Bacilli</i>                                                               |                                                                                                                                                                                                                         |
| 4.3       | <i>Bacteria; Firmicutes; Bacilli; Lactobacillales</i>                                              |                                                                                                                                                                                                                         |
| 4.4       | <b>Bacteria; Firmicutes; Bacilli; Lactobacillales; Carnobacteriaceae; Trichococcus</b>             | Fermentative bacteria, detected in mesophilic hydrogen-producing consortia as bacteria that accompany hydrogen producers (Sikora 2013)                                                                                  |
| 4.1       | <i>Bacteria; Firmicutes; Clostridia; Clostridiales; Acidaminobacteraceae</i>                       | Potential syntrophic oxidizing bacteria (SAO) (Dyksma 2020, Lim 2020)                                                                                                                                                   |
| 3.3       | <i>Bacteria; Firmicutes; Clostridia; Clostridiales; Tissierellaceae</i>                            | Potential syntrophic oxidizing bacteria (Dyksma 2020, Lim 2020)                                                                                                                                                         |
| 3.4       | <b>Bacteria; Firmicutes; Clostridia; Clostridiales; Tissierellaceae; Sedimentibacter</b>           | Potential syntrophic oxidizing bacteria (Dyksma 2020, Lim 2020)                                                                                                                                                         |
| 3.4       | <b>Bacteria; Firmicutes; Erysipelotrichi; Erysipelotrichales; Erysipelotrichaceae; Clostridium</b> | Syntrophic butyrate producer (Vital 2014)                                                                                                                                                                               |
| 3.3       | <i>Bacteria; Proteobacteria; Gammaproteobacteria</i>                                               | Macromolecules degradation, VFA and alcohol (Khan 2021)                                                                                                                                                                 |
| 3.5       | <i>Bacteria; Proteobacteria; Gammaproteobacteria; Enterobacteriales</i>                            |                                                                                                                                                                                                                         |
| 3.4       | <b>Bacteria; Proteobacteria; Gammaproteobacteria; Enterobacteriales; Enterobacteriaceae</b>        |                                                                                                                                                                                                                         |
| 3.3       | <b>Bacteria; Synergistetes; Synergistia; Synergistales; Thermovirgaceae</b>                        | The increase in the relative abundance of <i>Synergistales</i> was found to be highly correlated with the increased rate of methane production from oil via hydrogenotrophic <i>archaea</i> (Nakasaki 2019)             |
| 3.5       | <i>Bacteria; WWE1</i>                                                                              |                                                                                                                                                                                                                         |
| 3.6       | <i>Bacteria; WWE1; Cloacamonae</i>                                                                 |                                                                                                                                                                                                                         |
| 3.6       | <i>Bacteria; WWE1; Cloacamonae; Cloacamonales</i>                                                  |                                                                                                                                                                                                                         |
| 3.6       | <i>Bacteria; WWE1; Cloacamonae; Cloacamonales; Cloacamonaceae</i>                                  |                                                                                                                                                                                                                         |
| 3.4       | <b>Bacteria; WWE1; Cloacamonae; Cloacamonales; Cloacamonaceae; W22</b>                             | Syntrophic fatty-acid bacteria (Esquivel-Elizondo 2016) that have metabolic capabilities for butyrate and propionate fermentation, as well as for reverse acetogenesis (acetate catabolism by methanogens)              |
| 4.6       | <i>Archaea</i>                                                                                     |                                                                                                                                                                                                                         |
| 4.4       | <i>Archaea; Euryarchaeota</i>                                                                      |                                                                                                                                                                                                                         |
| 3.6       | <i>Archaea; Euryarchaeota; Methanobacteria</i>                                                     |                                                                                                                                                                                                                         |

|     |                                                                                                                      |                                                                                                                           |
|-----|----------------------------------------------------------------------------------------------------------------------|---------------------------------------------------------------------------------------------------------------------------|
| 3.5 | <i>Archaea; Euryarchaeota; Methanobacteria; Methanobacteriales</i>                                                   | Hydrogenotrophic methanogens (Ziganshin 2016)                                                                             |
| 3.5 | <i>Archaea; Euryarchaeota; Methanobacteria; Methanobacteriales; Methanobacteriaceae</i>                              | Hydrogenotrophic methanogens (Ziganshin 2016)                                                                             |
| 3.5 | <b><i>Archaea; Euryarchaeota; Methanobacteria; Methanobacteriales; Methanobacteriaceae; Methanobacterium</i></b>     | Hydrogenotrophic methanogens (Ziganshin 2016)                                                                             |
| 4.6 | <i>Archaea; Euryarchaeota; Methanomicrobia</i>                                                                       |                                                                                                                           |
| 4.1 | <i>Archaea; Euryarchaeota; Methanomicrobia; Methanomicrobiales; Methanocorpusculaceae</i>                            | Hydrogenotrophic methanogens (Ziganshin 2016)                                                                             |
| 4.2 | <b><i>Archaea; Euryarchaeota; Methanomicrobia; Methanomicrobiales; Methanocorpusculaceae; Methanocorpusculum</i></b> | Hydrogenotrophic methanogens (Ziganshin 2016)                                                                             |
| 4.1 | <i>Archaea; Euryarchaeota; Methanomicrobia; Methanosarcinales</i>                                                    | Acetoclastic methanogens (Ziganshin 2016)                                                                                 |
| 4.2 | <i>Archaea; Euryarchaeota; Methanomicrobia; Methanosarcinales; Methanosarcinaceae</i>                                | Acetoclastic methanogens (Ziganshin 2016)                                                                                 |
| 4.4 | <b><i>Archaea; Euryarchaeota; Methanomicrobia; Methanosarcinales; Methanosarcinaceae; Methanosarcina</i></b>         | Acetoclastic methanogens (Ziganshin 2016)                                                                                 |
| 3.3 | <b><i>Bacteria; Bacteroidetes; Bacteroidia; Bacteroidales; Marinilabiaceae</i></b>                                   | Saccharolytic bacteria (Hanreich 2013)                                                                                    |
| 3.9 | <i>Bacteria; Chloroflexi</i>                                                                                         |                                                                                                                           |
| 3.7 | <i>Bacteria; Chloroflexi; Anaerolineae; Anaerolineales</i>                                                           |                                                                                                                           |
| 3.6 | <i>Bacteria; Chloroflexi; Anaerolineae; Anaerolineales; Anaerolinaceae</i>                                           |                                                                                                                           |
| 3.7 | <b><i>Bacteria; Chloroflexi; Anaerolineae; Anaerolineales; Anaerolinaceae; T78</i></b>                               | Hydrolytic or fermentative bacteria (Yamada 2005)                                                                         |
| 3.3 | <b><i>Bacteria; Firmicutes; Clostridia; Clostridiales; Lachnospiraceae</i></b>                                       | Syntrophic acetogenic bacteria (Gagen 2015)                                                                               |
| 3.8 | <b><i>Bacteria; Firmicutes; Erysipelotrichi; Erysipelotrichales; Erysipelotrichaceae; RFN20</i></b>                  |                                                                                                                           |
| 3.5 | <i>Bacteria; Spirochaetes; Spirochaetes</i>                                                                          |                                                                                                                           |
| 3.5 | <i>Bacteria; Spirochaetes; Spirochaetes; Spirochaetales</i>                                                          |                                                                                                                           |
| 3.5 | <i>Bacteria; Spirochaetes; Spirochaetes; Spirochaetales; Spirochaetaceae</i>                                         |                                                                                                                           |
| 3.5 | <b><i>Bacteria; Spirochaetes; Spirochaetes; Spirochaetales; Spirochaetaceae; Treponema</i></b>                       | Homoacetogens, which consume H <sub>2</sub> and CO <sub>2</sub> to produce acetate. Alternative hydrogenotrophs (Li 2016) |
| 3.5 | <b><i>Bacteria; Synergistetes; Synergistia; Synergistales; Dethiosulfovibrionaceae; Aminobacterium</i></b>           | Syntrophic acetogenic bacteria on aminoacids (Morris 2013)                                                                |
